# Supplementary material for: Synthesis and Evaluation of the Antifungal and Toxicological Activity of Nitrofuran Derivatives
Source: MDPI journal article supplement (doi:10.3390/pharmaceutics14030593), 2022-03-08
Supplement: s1 [file s1]

# Supplementary Materials: Synthesis and Evaluation of the Antifungal and Toxicological Activity of Nitrofuran Derivatives

Carolina Orlando Vaso, Fabiana Pandolfi, Níura Madalena Bila, Daniela De Vita, Martina Bortolami, Maria José Soares Mendes-Giannini, Valeria Tudino, Roberta Costi, Caroline Barcelos Costa-Orlandi, Ana Marisa Fusco-Almeida and Luigi Scipione

Table S1. list of CAS number of nitrofurans 4-14.

| Compound | Structure | CAS         | Compound | Structure | CAS          |
|----------|-----------|-------------|----------|-----------|--------------|
| 4        |           | 330466-62-1 | 10       |           | 74470-48-7   |
| 5        |           | 908539-64-0 | 11       |           | 74470-50-1   |
| 6        |           | 330468-41-2 | 12       |           | 74470-56-7   |
| 7        |           | 796056-49-0 | 13       |           | 2101758-58-9 |
| 8        |           | 67001-70-1  | 14       |           | 2101758-48-7 |
| 9        |           | 74470-51-2  |          |           |              |

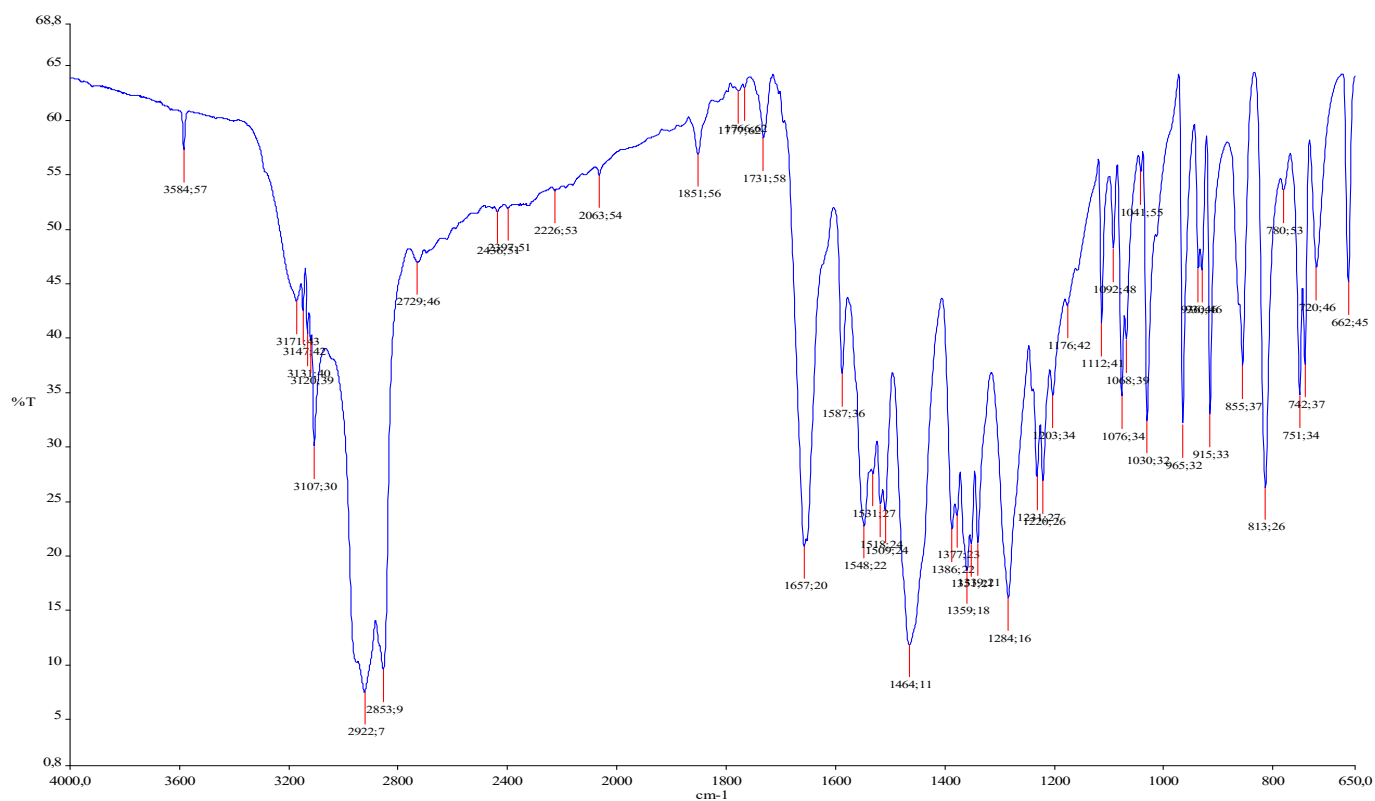

Figure S1. IR spectra of (nujol mull) compound 2.

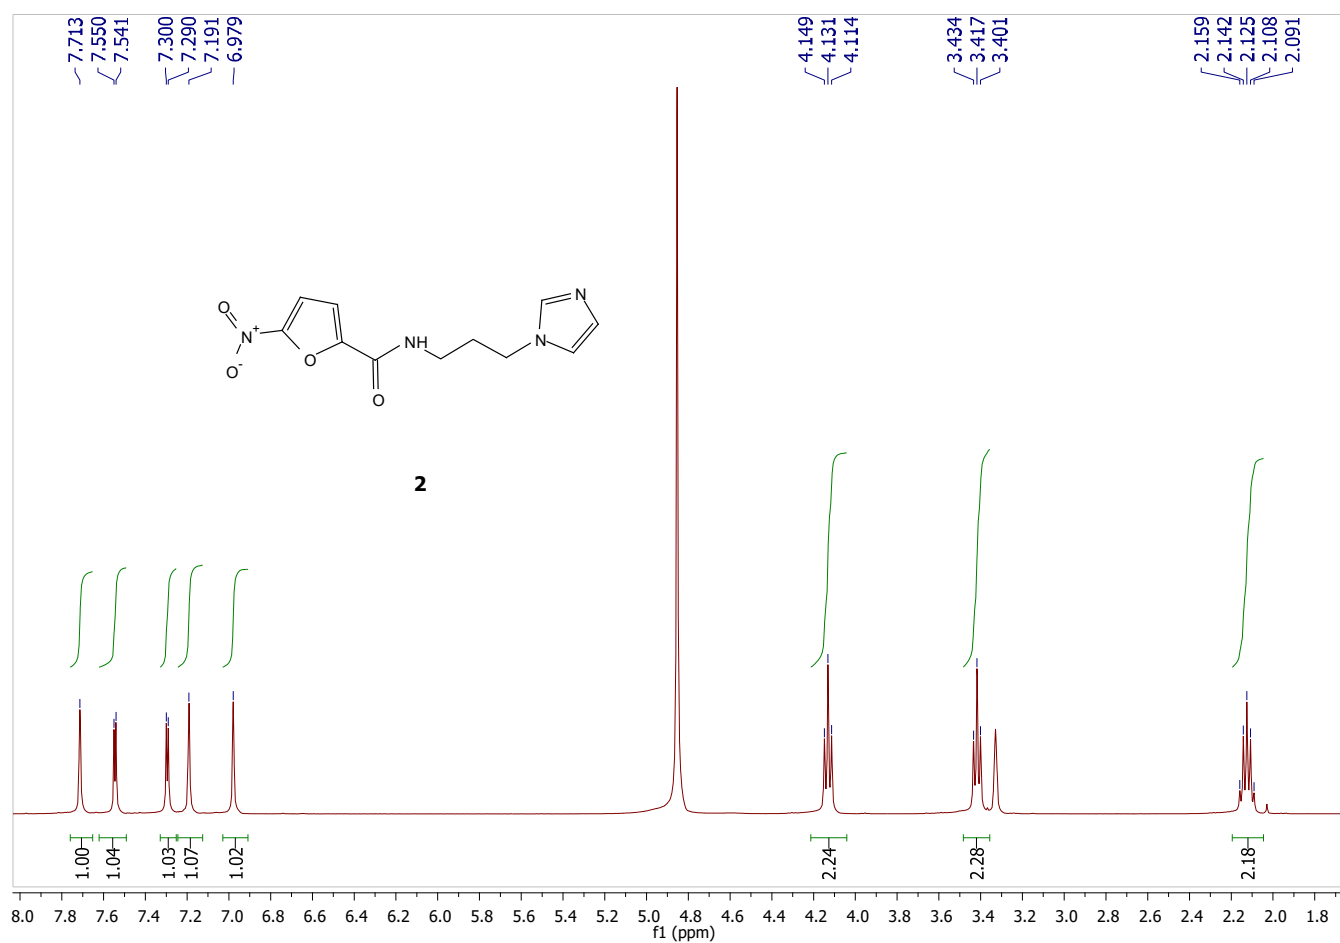

Figure S2. <sup>1</sup>H NMR spectra of (400 MHz, MeOD) compound 2.

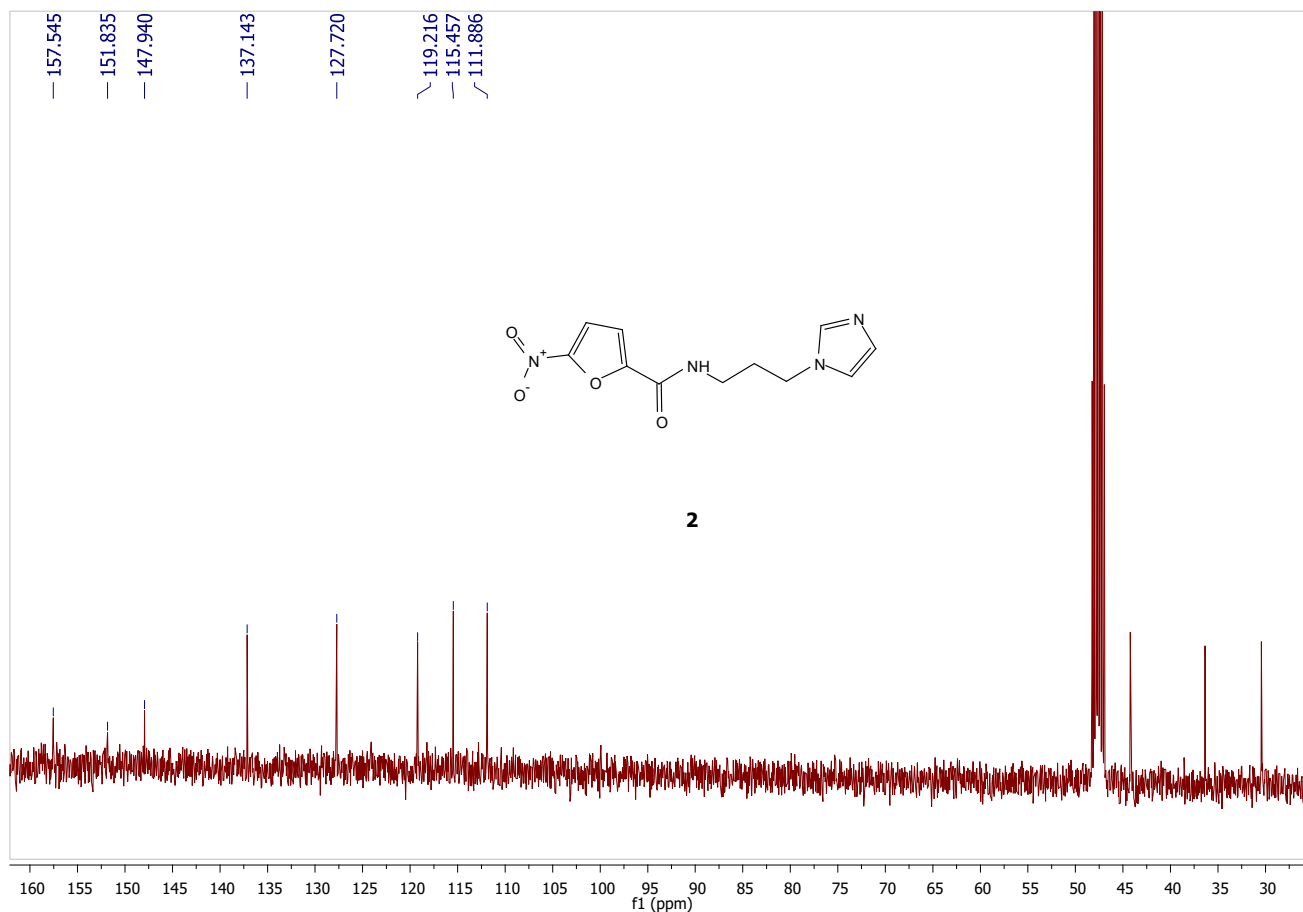

Figure S3. <sup>13</sup>C NMR spectra of (100 MHz, MeOD) compound 2.

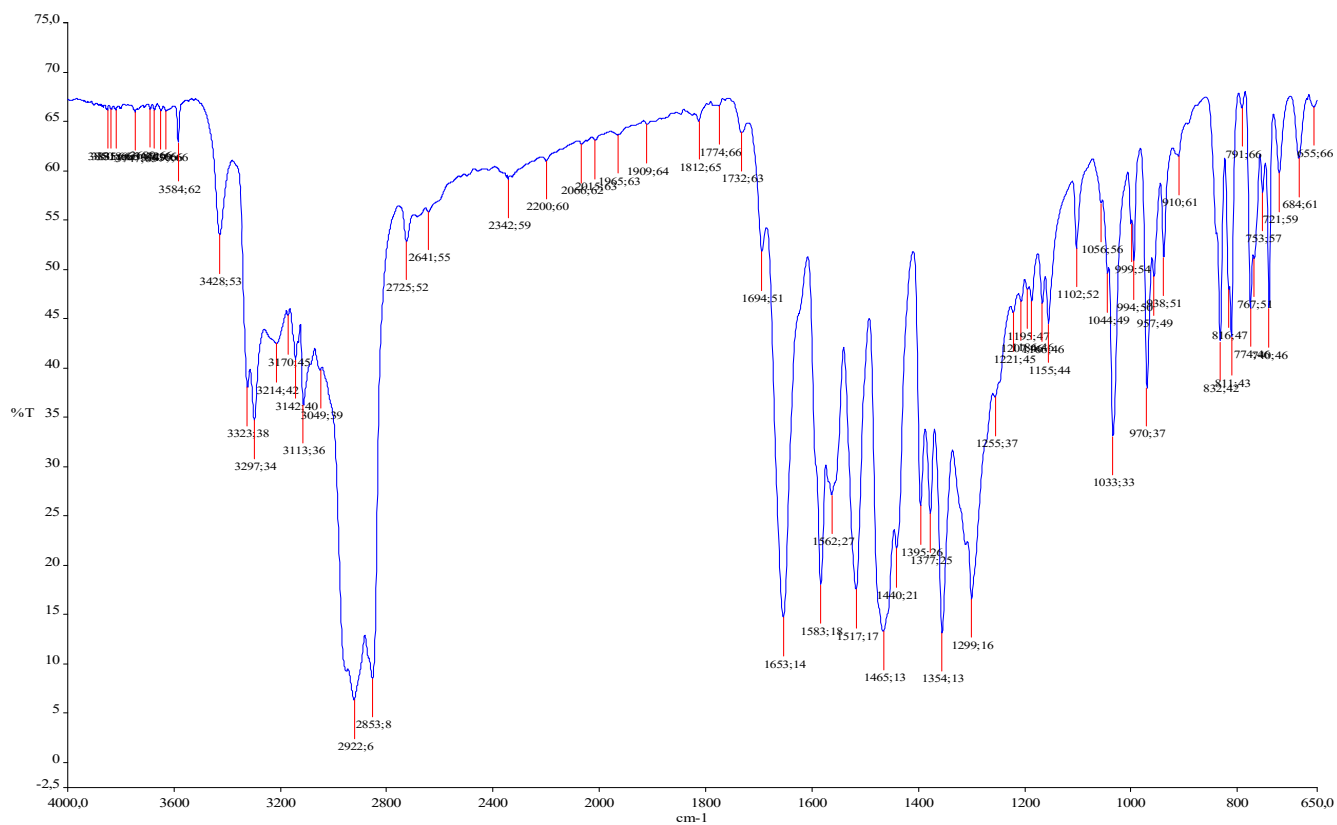

Figure S4. IR spectra of (nujol mull) compound 3.

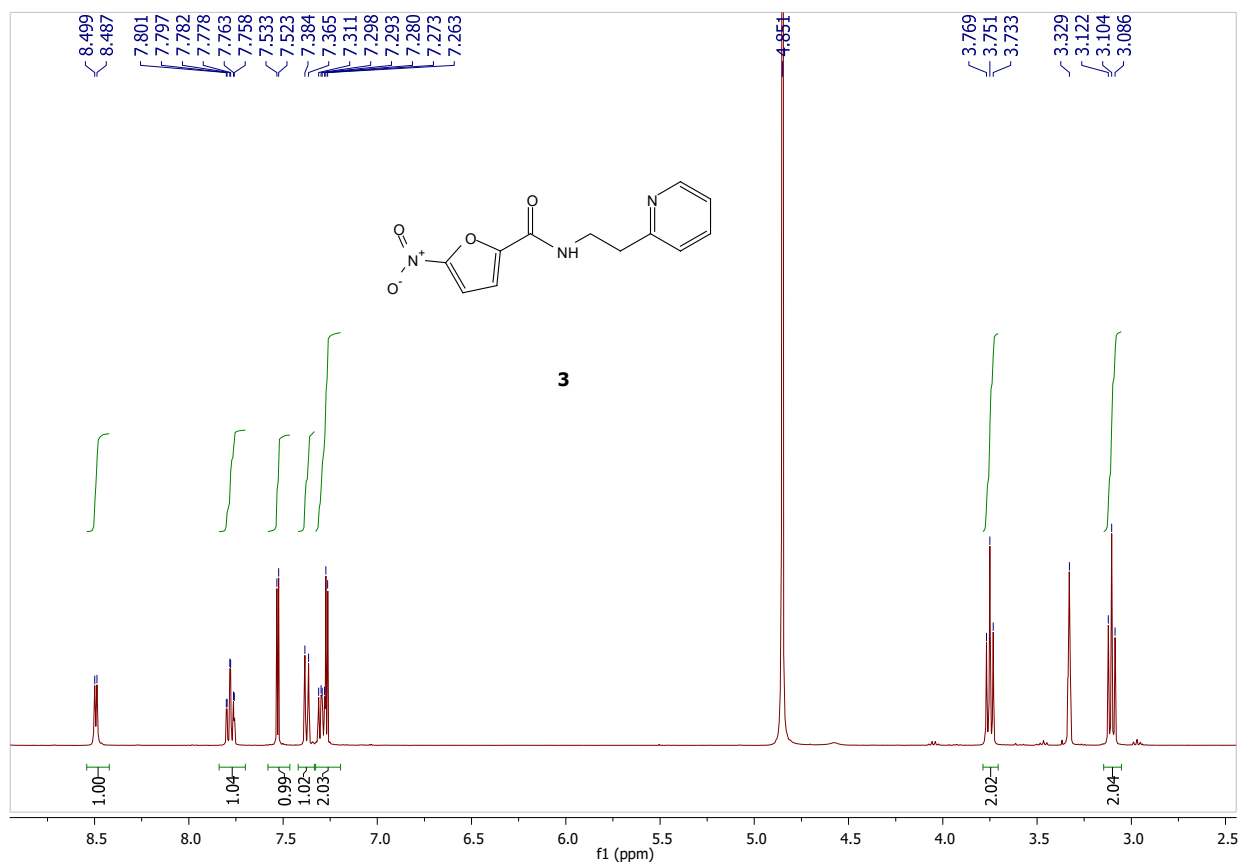

**Figure S5.** <sup>1</sup>H NMR spectra of (400 MHz, MeOD) compound **3**.

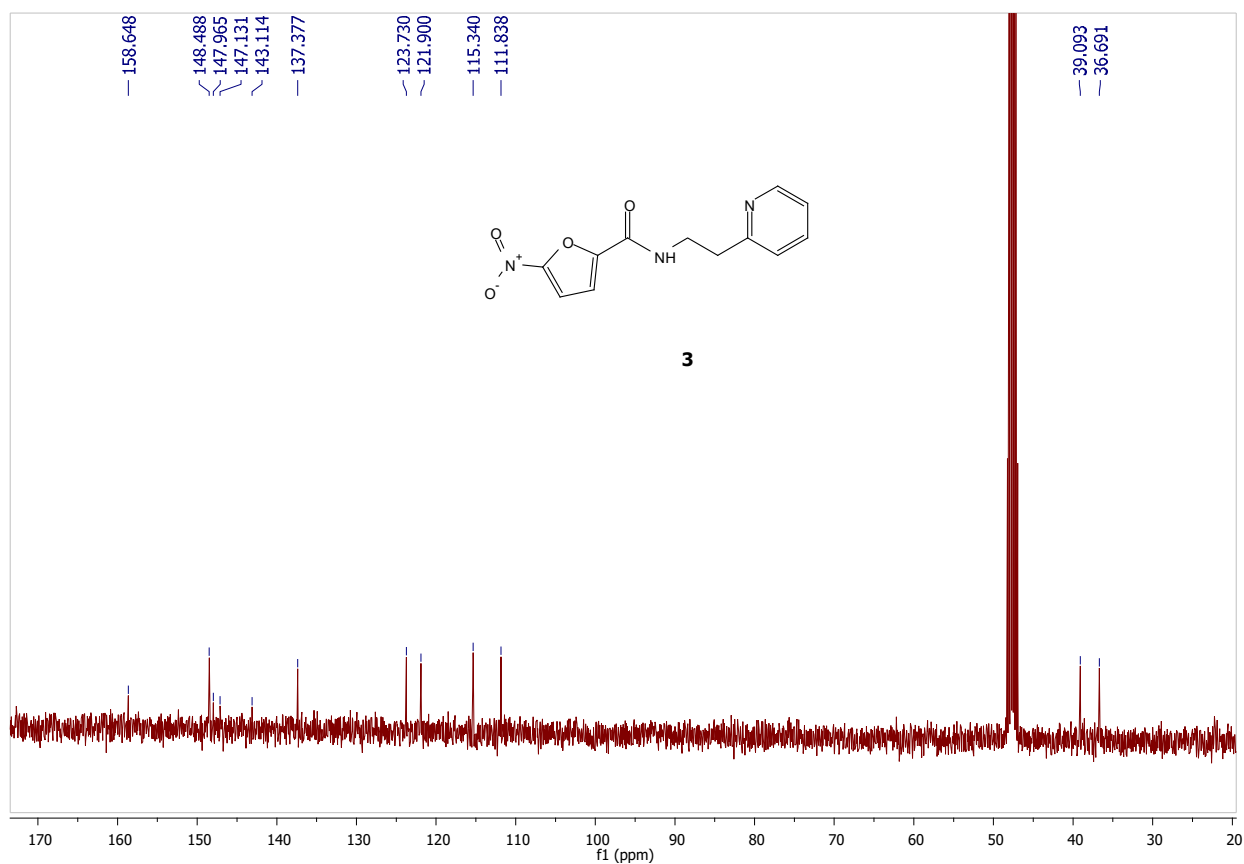

**Figure S6.** <sup>13</sup>C NMR spectra of (100 MHz, MeOD) compound **3**.

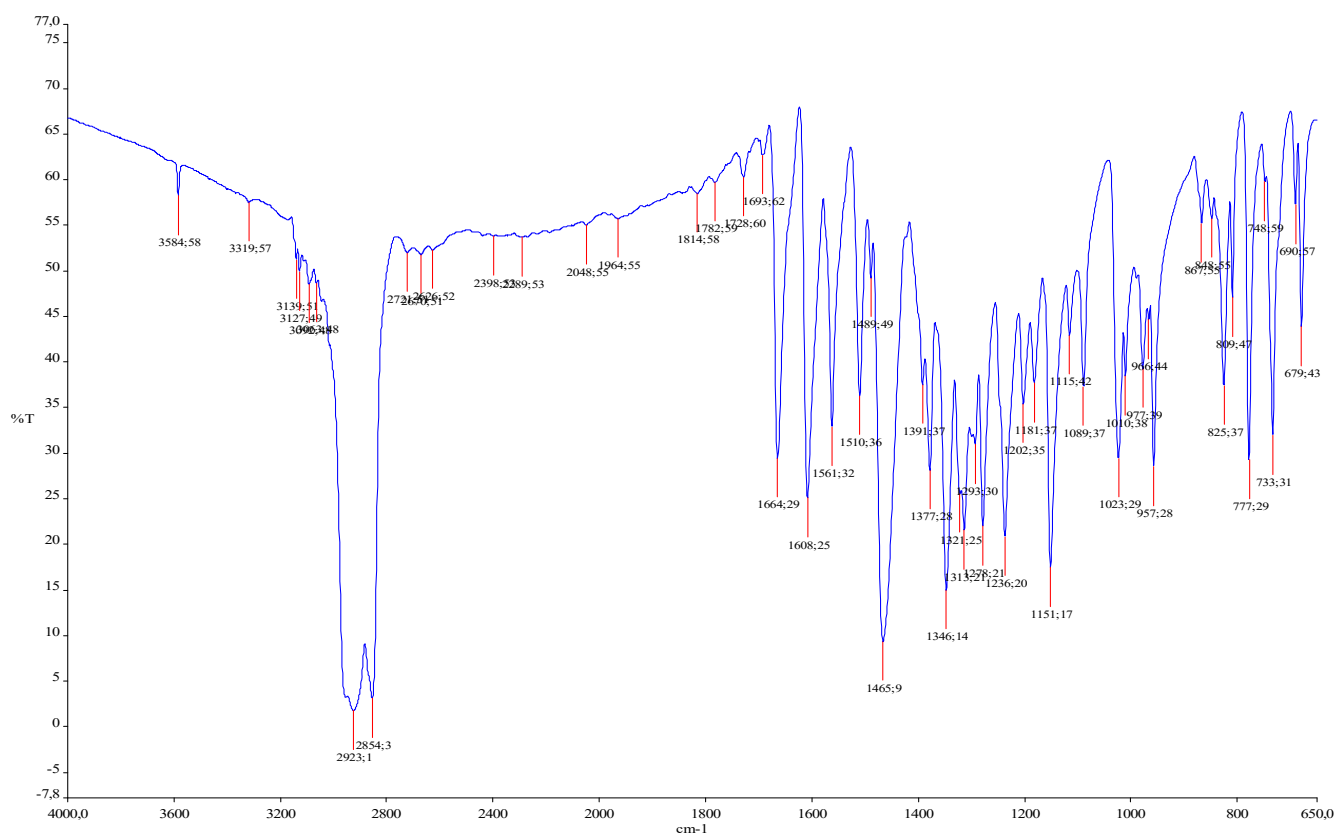

Figure S7. IR spectra of (nujol mull) compound **15**.

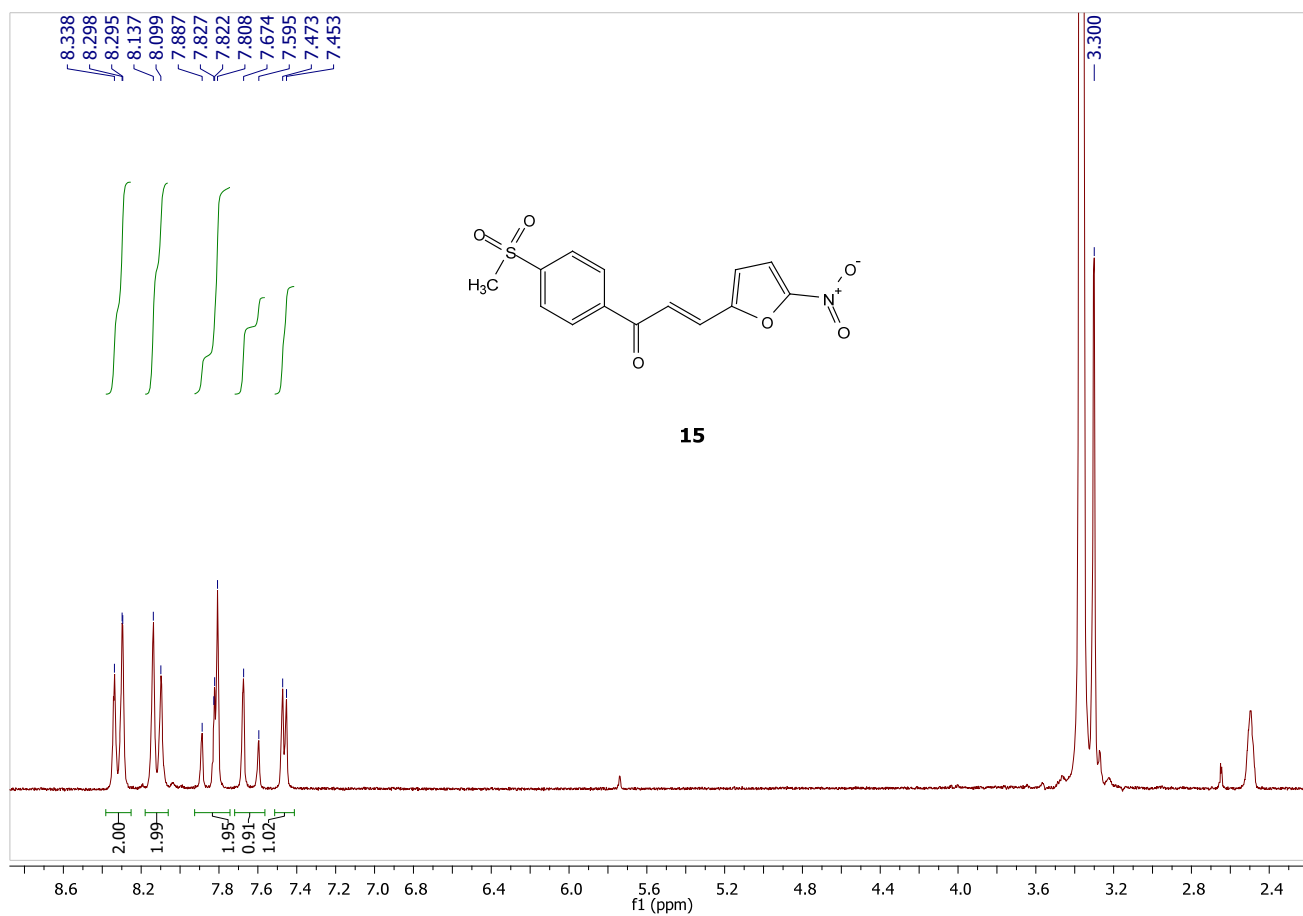

Figure S8. <sup>1</sup>H NMR spectra of (400 MHz, DMSO-*d*<sub>6</sub>) compound **15**.

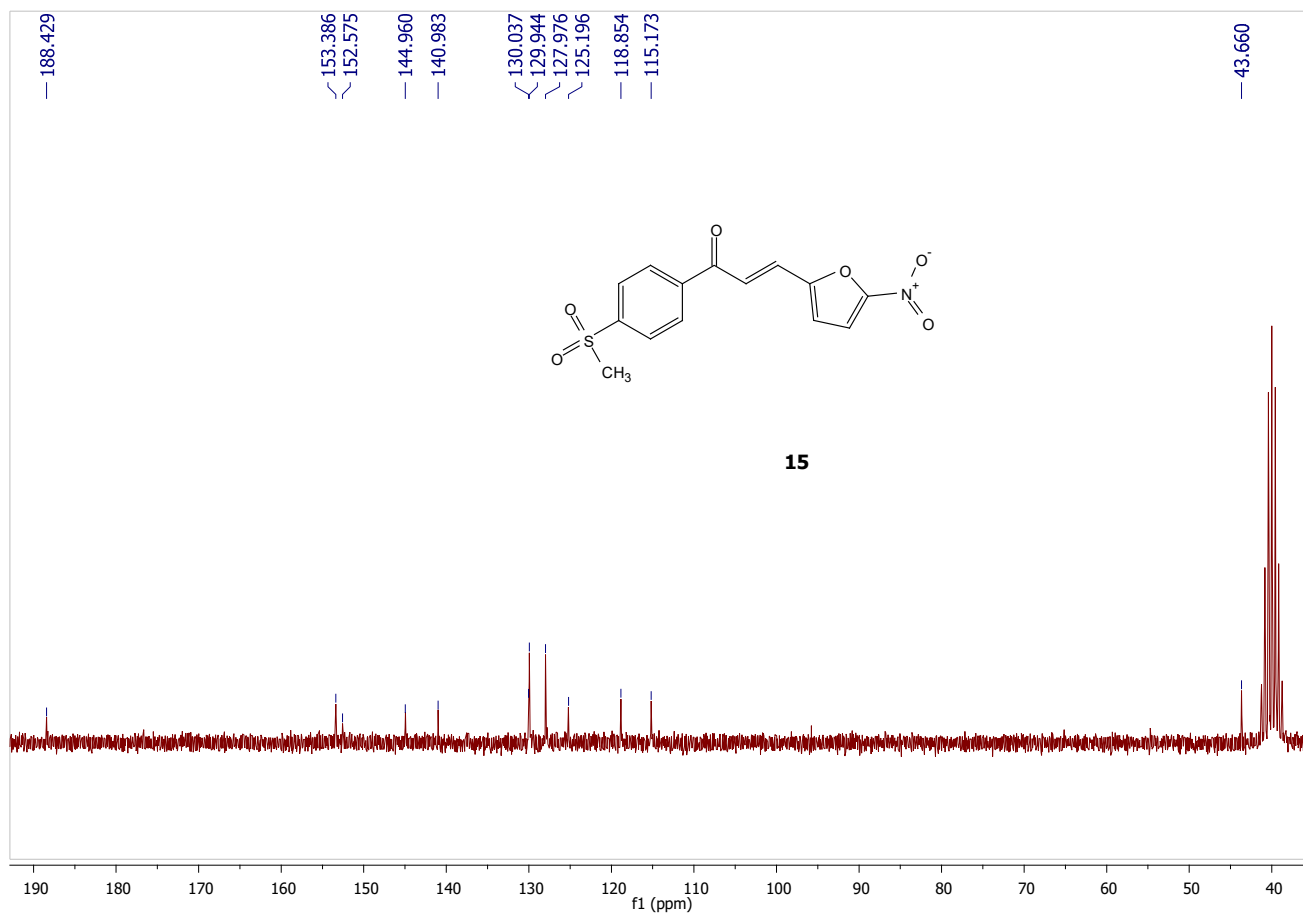

Figure S9. <sup>13</sup>C NMR spectra of (100 MHz, DMSO-*d*<sub>6</sub>) compound 15.

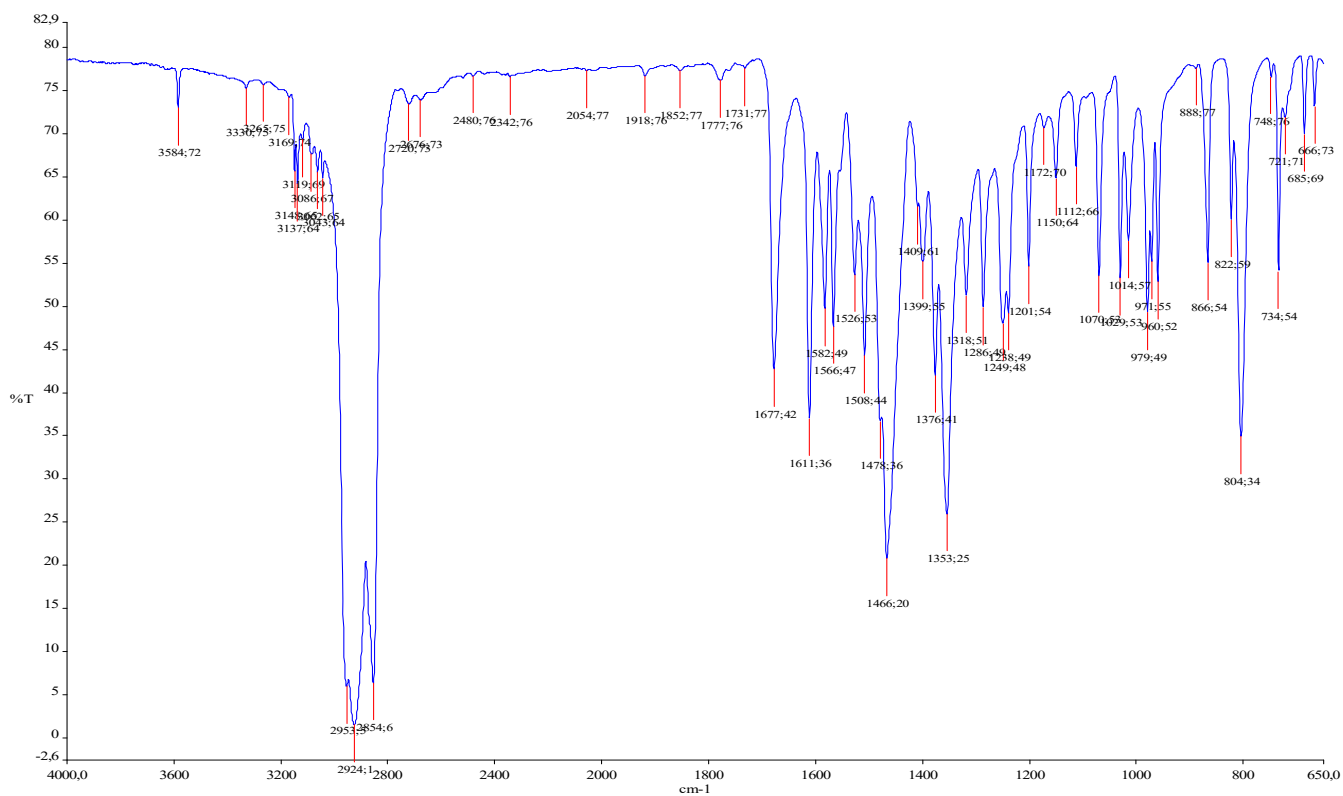

Figure S10. IR spectra of (nujol mull) compound 16.

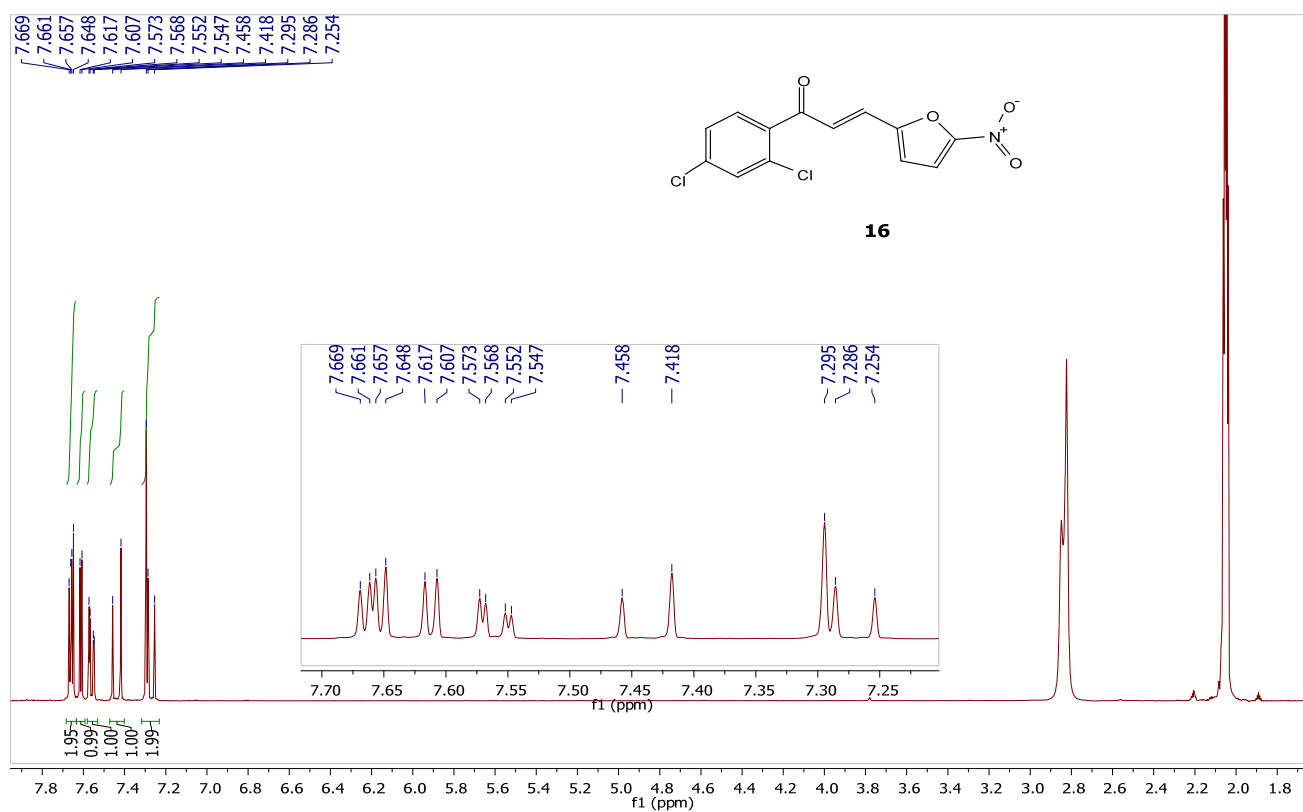

**Figure S11.** <sup>1</sup>H NMR spectra of (400 MHz, Acetone-*d*<sub>6</sub>) compound **16**.

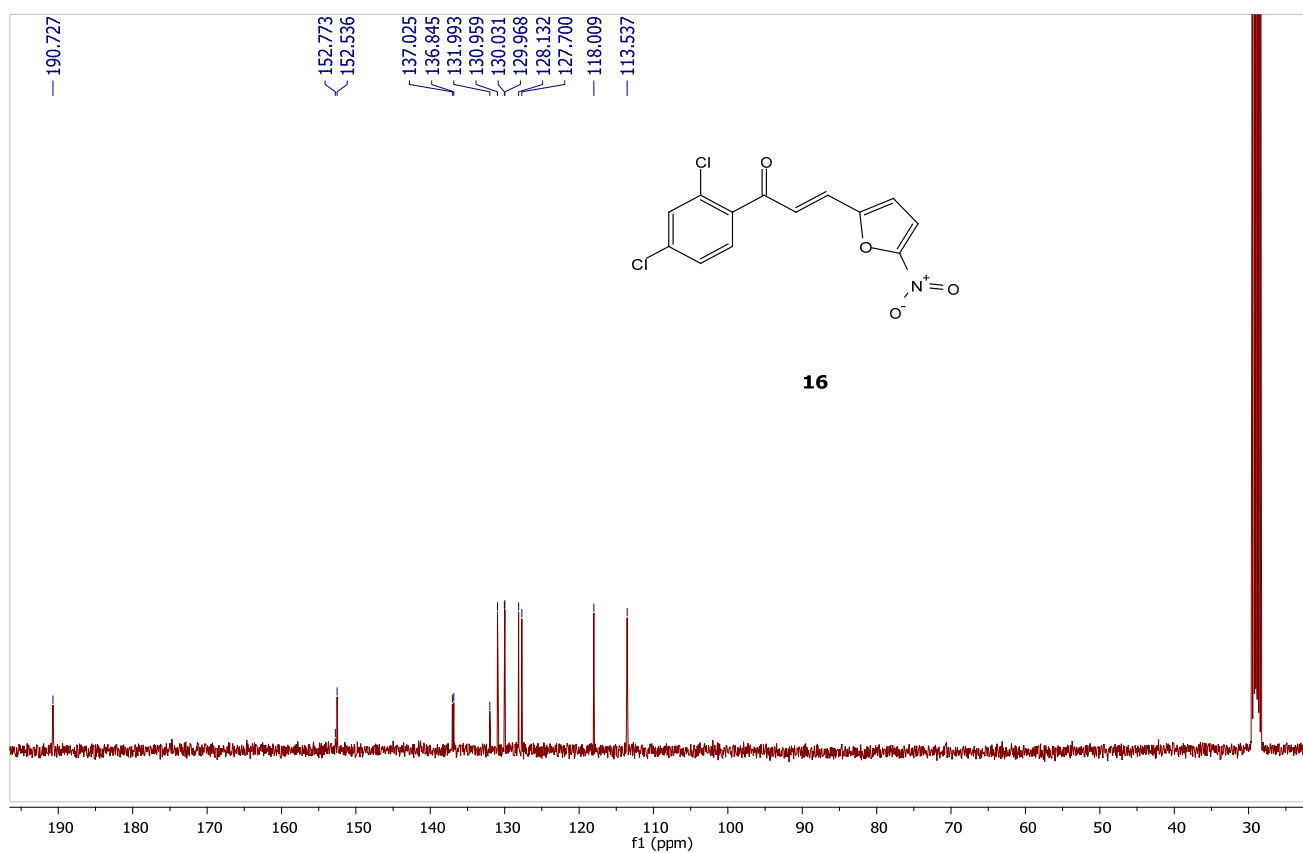

**Figure S12.** <sup>13</sup>C NMR spectra of (100 MHz, Acetone-*d*<sub>6</sub>) compound **16**.

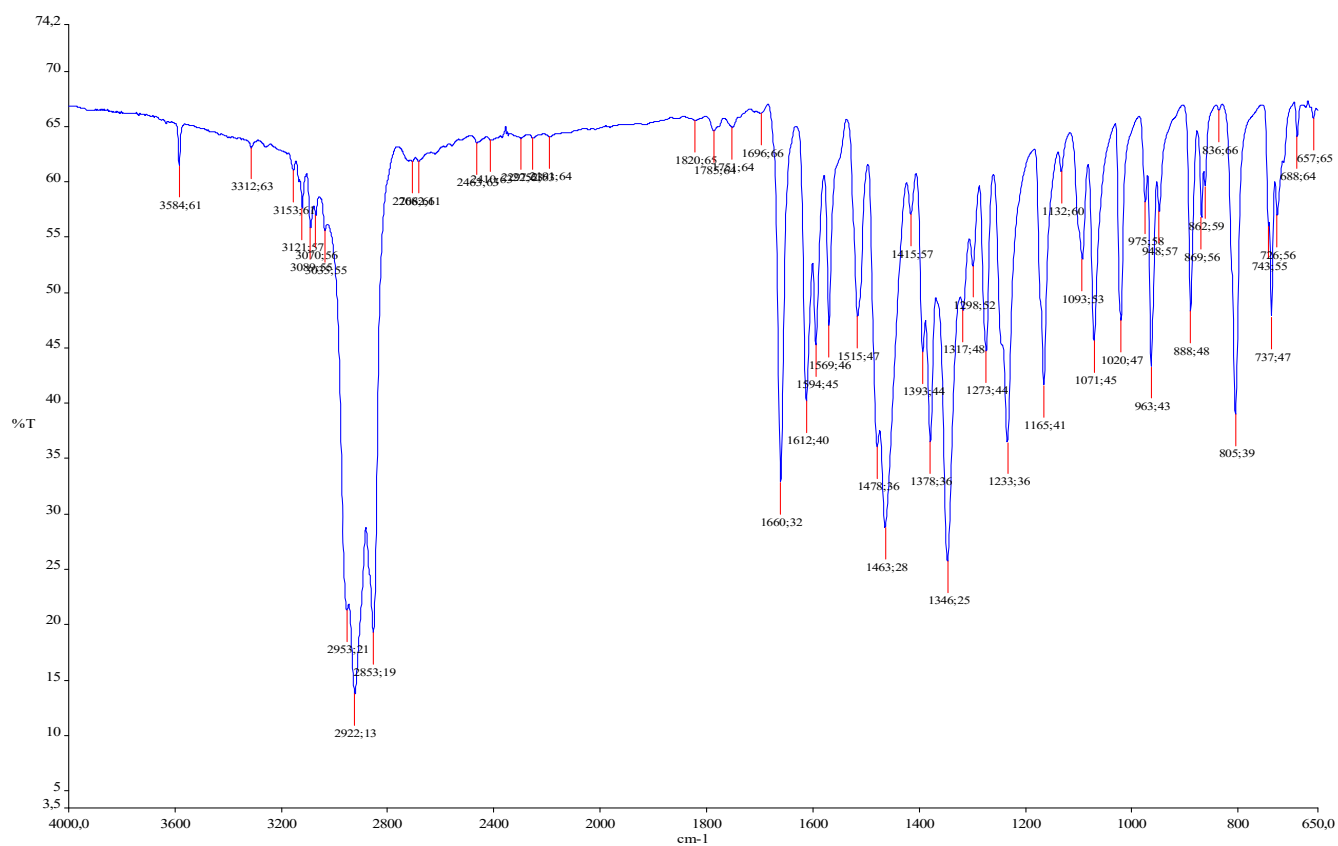

**Figure S13.** IR spectra of (nujol mull) compound **17**.

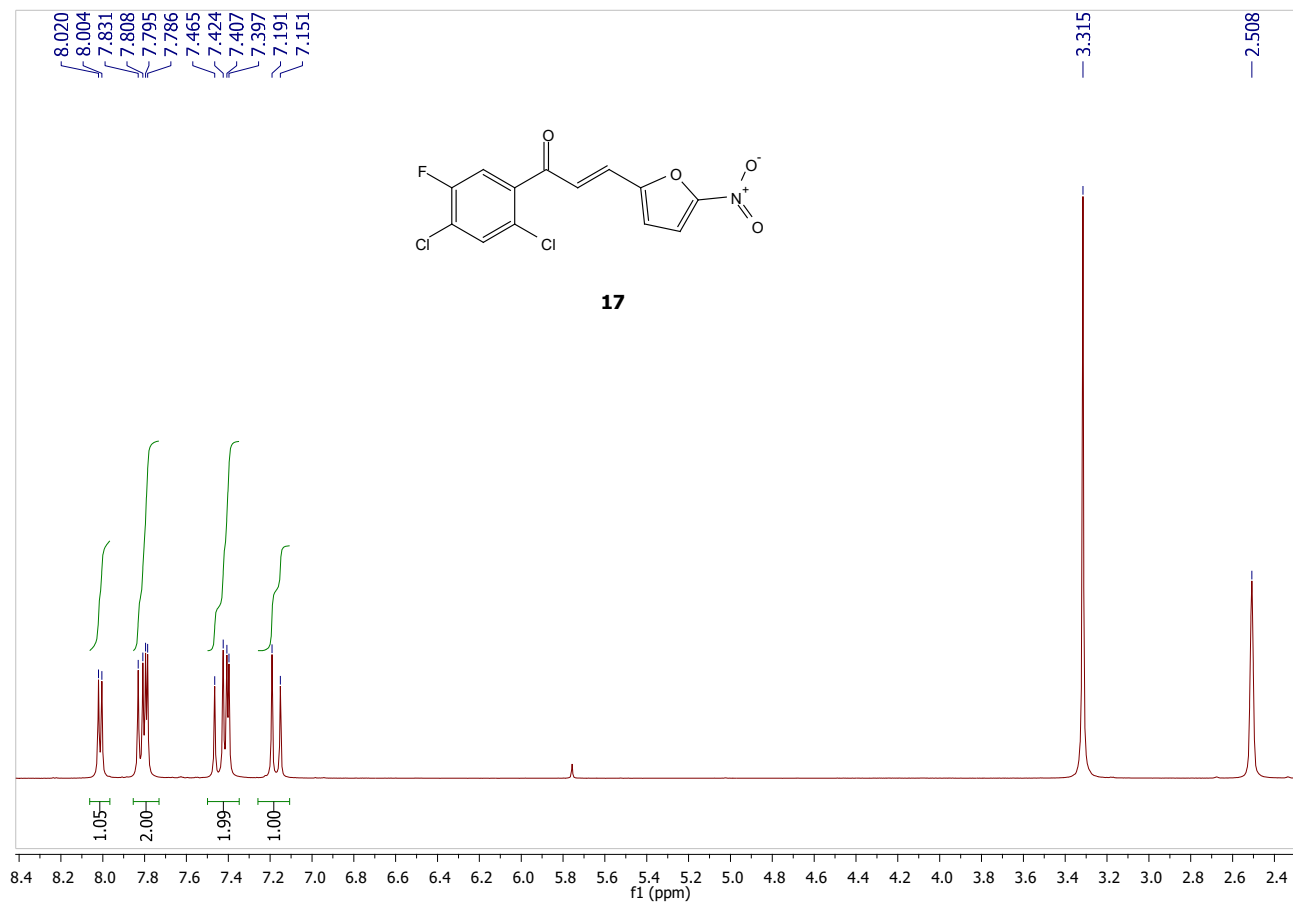

**Figure S14.** <sup>1</sup>H NMR spectra of (400 MHz, DMSO-*d*<sub>6</sub>) compound **17**.



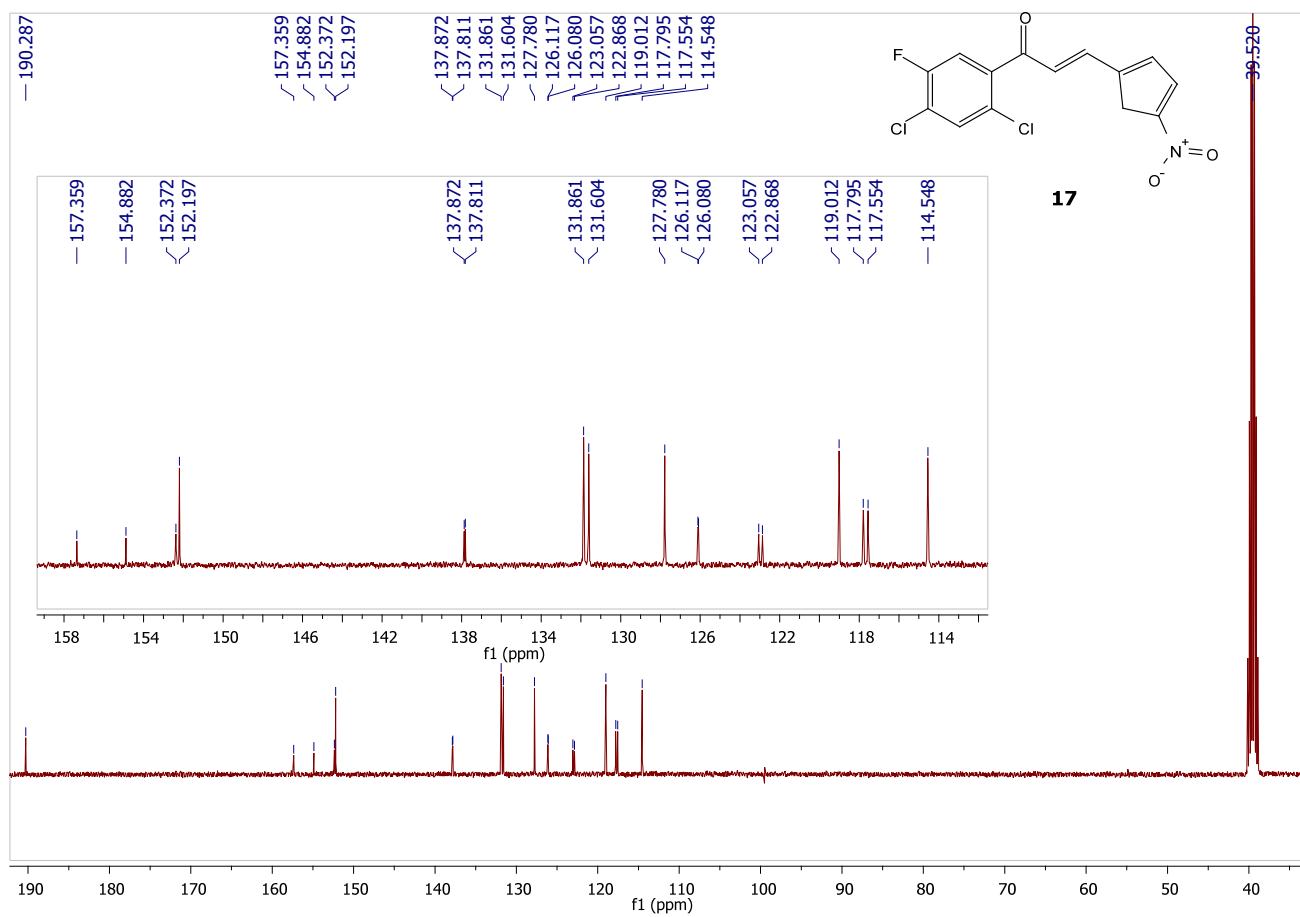

**Figure S15.**  $^{13}\text{C}$  NMR spectra of (100 MHz,  $\text{DMSO-}d_6$ ) compound **17**.
